# Supplementary material for: MicroRNA-146 represses endothelial activation by inhibiting pro-inflammatory pathways
Source: PubMed Central journal article supplement (PMC3721471; doi:10.1002/emmm.201202318), 2013-06-03
Supplement: emmm0005-0949-SD2.pdf [file emmm0005-0949-SD2.pdf]

## Supporting Information:

**Cheng *et al.*, MicroRNA-146 represses endothelial activation by inhibiting pro-inflammatory pathways**

### Table of Contents:

#### Supplemental Methods

**Supporting Information Table I:** Primers used for qRT- PCR

**Supporting Information Figure S1:** TNF- $\alpha$  induces miR-146a and miR-146b expression

**Supporting Information Figure S2:** Over-expression of miR-146a inhibits monocyte adhesion to IL-1 $\beta$ - treated bovine aortic endothelial cells (BAEC)

**Supporting Information Figure S3:** miR-146a does not directly regulate *EGR-3*

**Supporting Information Figure S4:** A potential miR-146 binding site in *HuR* is highly conserved across species

**Supporting Information Figure S5:** miR-146 controls the expression of *HuR* mRNA

**Supporting Information Figure S6:** *HuR* knock-down represses THP-1 adhesion to TNF- $\alpha$ -treated endothelial cells

**Supporting Information Figure S7:** Predicted AU-rich elements (AREs) in the 3' UTRs of genes involved in endothelial activation

**Supporting Information Figure S8:** HuR binds to *VCAM-1* and *MCP-1* mRNA but does not regulate the induction of these genes by IL-1 $\beta$

**Supporting Information Figure S9:** The miR-146 targets, *HuR* and *TRAF6*, have divergent effects on the induction of inflammatory genes

**Supporting Information Figure S10:** MicroRNAs previously implicated in regulating inflammation are not appreciably altered in *miR-146a*<sup>-/-</sup> mice

**Supporting Information Figure S11:** Expression of eNOS is modestly decreased in *miR-146a*<sup>-/-</sup> mice

**Supporting Information Figure S12:** *KLF2* mRNA is bound by HuR and knock-down of *HuR* leads to increased levels of *KLF2* transcripts

**Supporting Information Figure S13:** Schematic of a miR-146 feedback loop that controls endothelial activation

## Supplemental Methods:

**Luciferase assays and cloning:** Constructs containing the wild-type *TRAF6* 3' UTR or a *TRAF6* 3' UTR with one of the two miR-146 binding sites mutated (in pMIR-REPORT) were previously described (Taganov et al, 2006). A 600-bp region of the 3' UTR of human *EGR3*, which contains the potential miR-146 binding site, was PCR amplified from HUVEC cDNA using the following primers: 5'-TAGAAGGAGAGAGAAGAAGATGAAGTTTGC and 5'-GAATTTCCACCTTTTCACAATATCAAGCATA (with XbaI linkers), and was cloned into the XbaI site located in the 3' UTR of pGL3-promoter (Promega). Similarly a 517-bp region of the 3' UTR of human *HuR* (*ELAVL1*) was amplified using the following primers: 5'-GAGGCGTAAAATGGCTCTGT and 5'-AGTTACAGGCTGGTGGCTTT (with XbaI linkers). The miR-146 seed match in the *HuR* 3' UTR (AGTTCTC) was mutated to (ACAAGAC) by site-directed mutagenesis (QuikChange II Kit, Agilent). To generate a luciferase construct that included a concatemer of the potential miR-146 binding site in the 3' UTR of *EGR3*, the following oligos (containing a 5' phosphate group) were synthesized: 5'-GGGAGTTTTTCCTTTG TTTTAATAAAACTGTTCTCAGACATTA, 5'-CCTAATGTCTGAGAACAGTTTTATTAA AACAAAGGAAAACCTC; miR-146 seed match underlined). These oligos were annealed together, ligated using T4 ligase (since they contain CC and GG over-hangs, respectively), and run on an agarose gel. The band corresponding to 5 copies of the sequence was gel purified, blunt-end filled using DNA polymerase and blunt-end cloned into the XbaI site of pGL3. Oligonucleotides containing a mutated miR-146 binding site were also cloned (5'-GGGAGTTTTTCCTTTGTTTTAATAAAACTGTAGACAGACATTA and 5'-CCTAATGTCTGTCTACAGTTTTATTAAAACAAAGGAAAACCTC; mutated miR-146 seed match underlined). The sequence, directionality and the number of concatemers inserted were confirmed by DNA sequencing.

HeLa cells grown in 12-well dishes were transfected with 1 µg of luciferase construct, 100 ng of pRL *Renilla* luciferase construct (Promega) (for normalization of transfection efficiency), and 20 nM of control or miR-146a mimic (Dharmacon), using Lipofectamine 2000. Cellular lysates were isolated 24 h post-transfection using Passive Lysis Buffer and luciferase activity was monitored using the Dual Luciferase Reporter Assay System (Promega) using a GloMax 20/20 Luminometer (Promega).

A *miR-146b* promoter/reporter construct (containing a 1 kb fragment of the *miR-146b* proximal promoter) was a kind gift from Dr. E. Flemington (Tulane University Health Sciences Center). Site-directed mutagenesis was used to delete a putative EGR binding site 858-848 bp upstream of the mature miR-146b sequence using the following primers: 5'-GGGTTTCCTG GCCCCCTTCCTCCTTTC and 5'-GAAAGGAGGAAGGGGCCAGGAACCC. HeLa cells were transfected with 1 µg of wild-type or EGR-deleted *miR-146b* promoter/luciferase constructs together with a 0.5 µg of an empty or EGR3 expression construct (a kind gift from Dr. J.D. Powell (John Hopkins)) as above. A *Renilla* construct (100 ng) was co-transfected to control for transfection efficiency. To analyze NF-κB activity, HUVEC were first transfected with control, miR-146a mimic, miR-146 inhibitor, *TRAF6* or *HuR* siRNAs, and after 24 h the cells were electroporated with 1 µg of a 5x NF-κB element-luciferase reporter (Promega) and 0.5 µg of *Renilla* (to control for electroporation efficiency) using a Lonza 4D Nucleofector with the P5 Primary Cell Kit. After 24 h, cells were treated with 10 ng/mL of IL-1β for 6 h, and luciferase activity was assessed as above.

**Supporting Information Table I:** Primers used for qRT- PCR

| <b>Gene</b>                                 | <b>Forward Primer (5' -&gt; 3')</b> | <b>Reverse Primer (5' -&gt; 3')</b> |
|---------------------------------------------|-------------------------------------|-------------------------------------|
| human <i>VCAM1</i>                          | GTTGAAGGATGCGGGAGTAT                | GGATGCAAAATAGAGCACGA                |
| human <i>SELE</i> (E-Selectin)              | CTGGCCTGCTACCTACCTGT                | AGCTACCAAGGGAATGTTGG                |
| human <i>ICAM1</i>                          | CGGCCAGCTTATACACAAGA                | GTCTGCTGGGAATTTTCTGG                |
| human <i>CCL2</i> (MCP-1)                   | TCATAGCAGCCACCTTCATT                | CGAGCCTCTGCACTGAGAT                 |
| human <i>EGR1</i>                           | CAGCACCTTCAACCCTCAG                 | TAAGTGGTCTCCACCAGCAC                |
| human <i>EGR3</i>                           | ACAATCTGTACCCCGAGGAG                | GTAAGAGAGTTCCGGGTTGG                |
| human <i>pri-miR-146a</i> (exon 1/intron 1) | CGGCTGAATTGGAAATGATA                | TGCTGCCTCTCAAACAGAAG                |
| human <i>pri-miR-146b</i>                   | AAGAAAGCATGCAAGAGCAG                | GCCTTGGCATTGATGTTGTA                |
| human <i>c-FOS</i>                          | TACTACCACTCACCCGCAGA                | AGTGACCGTGGGAATGAAGT                |
| human <i>c-JUN</i>                          | GAGAGCGGACCTTATGGCTA                | GTGAGGAGGTCCGAGTTCTT                |
| human <i>NOS3</i> (eNOS)                    | GGCATCACCAAGGAAGAAGACC              | TCACTCGCTTCGCGATCAC                 |
| human <i>TRAF6</i>                          | CCAAATCCATGCACATTCA                 | TTCTCATGTGTGACTGGGTGT               |
| human <i>ELAVL1</i> (HuR)                   | CTCTCGCAGCTGTACCACTC                | CACGTTGACGCCAGAGAG                  |
| human <i>KLF2</i>                           | Taqman assay #Hs00360439_g1         |                                     |
| human <i>GAPDH</i>                          | AGGTGAAGGTCGGAGTCAAC                | GAGGTCAATGAAGGGGTCAT                |
| human <i>TBP</i>                            | TCG GAG AGT TCT GGG ATT GT          | CAC GAA GTG CAA TGG TCT TT          |
| mouse <i>Vcam1</i>                          | GCACAAAGAAGGCTTTGAAGCA              | GATTTGAGCAATCGTTTTGTATTCAG          |
| mouse <i>Sele</i> (E-Selectin)              | GAACCAAAGACTCGGGCATGT               | ATGACCACTGCAGGATGCATT               |
| mouse <i>Icam1</i>                          | CTGCCTTGGTAGAGGTGACTGA              | AGGACAGGAGCTGAAAAGTTGTAGA           |
| mouse <i>Ccl2</i> (Mcp-1)                   | GTCCCTGTCATGCTTCTGG                 | ATTGGGATCATCTTGCTGGT                |
| mouse <i>Egr-1</i>                          | CTACCAATCCCAGCTCATCAAAC             | CTCATCCGAGCGAGAAAAGC                |
| mouse <i>Egr-3</i>                          | AAGCCCTTTGCCTGTGAGTTC               | CGACTTCTTCTCCTTTTGCTTGA             |
| mouse <i>Elavl1</i> (HuR)                   | GTACACCACCAGGCACAGAG                | CCAAGGTTGTAGATGAAGATGC              |
| mouse <i>NOS3</i> (eNOS)                    | CCAAGGTGATGAGCTCTGTG                | GAAGATATCTCGGGCAGCAG                |
| mouse <i>Tbp</i>                            | ACCCACCAGCAGTTCAGTAC                | CTGCTCTAACTTTAGCACCTGT              |

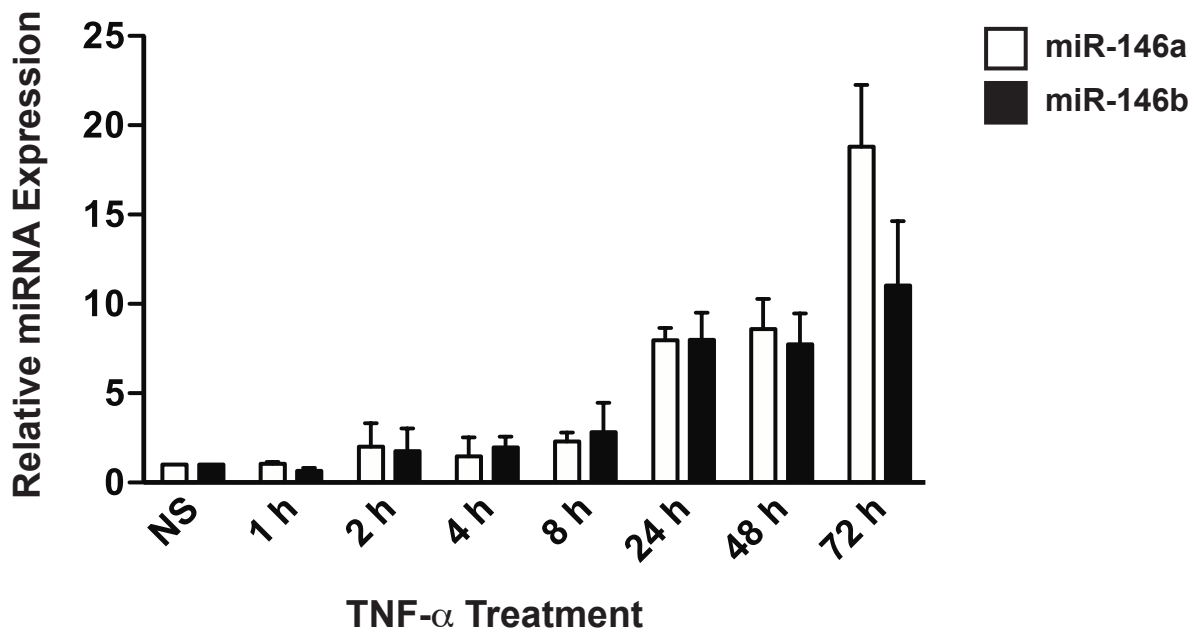

**Supporting Information Figure 1: TNF- $\alpha$  induces miR-146a and miR-146b expression.** HUVEC were stimulated with TNF- $\alpha$  and expression of miR-146a and miR-146b was assessed by qRT-PCR. Shown is the mean  $\pm$  SEM of 2 independent experiments. NS = non-stimulated.

### Bovine Aortic Endothelial Cells

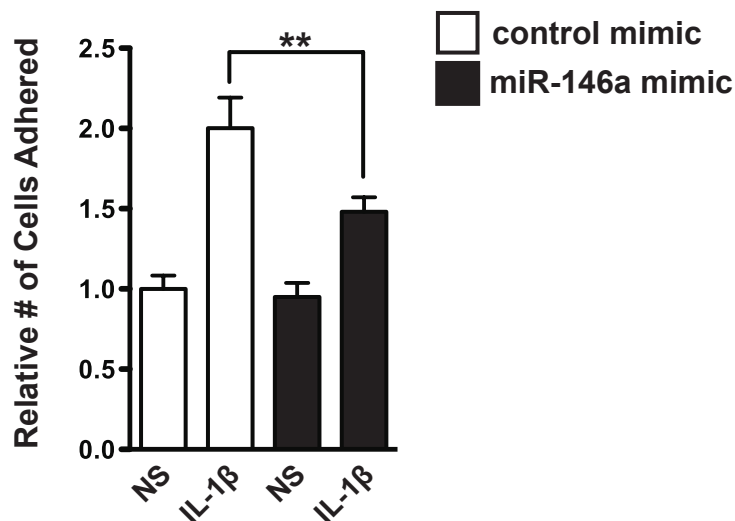

**Supporting Information Figure 2: Over-expression of miR-146a inhibits monocyte adhesion to IL-1 $\beta$ -treated bovine aortic endothelial cells (BAEC).** Shown is a representative experiment (quantification of 3 images from 3 independent wells). ANOVA,  $p < 0.0001$ . \*\* indicates a significant decrease ( $p < 0.01$ ) in the number of cells adhered to IL-1 $\beta$ -treated BAEC transfected with miR-146a mimic compared to control mimic.

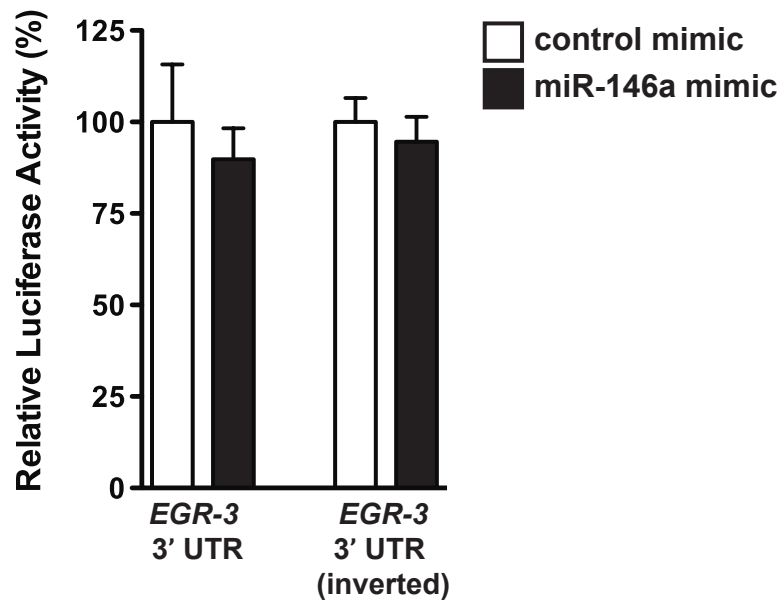

**Supporting Information Figure 3: miR-146a does not directly regulate *EGR-3*** - A Luciferase construct containing a fragment of the *EGR-3* 3' UTR that includes a putative miR-146 binding site was transfected into HeLa cells together with control or miR-146a mimic, and luciferase activity was measured. No change in luciferase activity was observed. As a control, a luciferase construct containing the same *EGR-3* 3' UTR, but in the inverse orientation, was used. Data from a representative experiment (transfections performed in triplicate) is shown.

### HuR (*ELAVL1*) 3' UTR

5' -- CUUUGAUUUGUAGUUUUAAGAUUAACCCUCAAGUUCUCUUCAUAA -- 3' **human**  
 5' -- CUUUGAUUUGUAGUUUUAAGGAUUAACCCUCAAGUUCUCUUCAUAA -- 3' **mouse**  
 5' -- CUUUGAUUUGUAGUUUUAAGGAUUAACCCUCAAGUUCUCUUCAUAA -- 3' **rat**

|||||

3' - UUGGGUACCUUAAGUCAAGAGU - 5' **miR-146a**  
 3' - UCGGAUACCUUAAGUCAAGAGU - 5' **miR-146b**

**Supporting Information Figure 4: A potential miR-146 binding site in *HuR* is highly conserved across species** - A portion of the 3' UTR of *HuR* is shown from human, mouse and rat, with the potential miR-146 binding site highlighted in yellow. The sequence of miR-146a and miR-146b is shown below, with the sequence differences between miR-146a and miR-146b indicated in red. The sequence of human, mouse and rat miR-146a and miR-146b are identical to that shown.

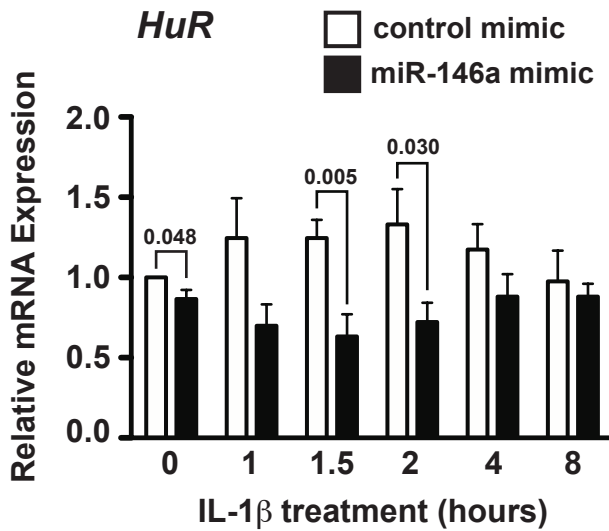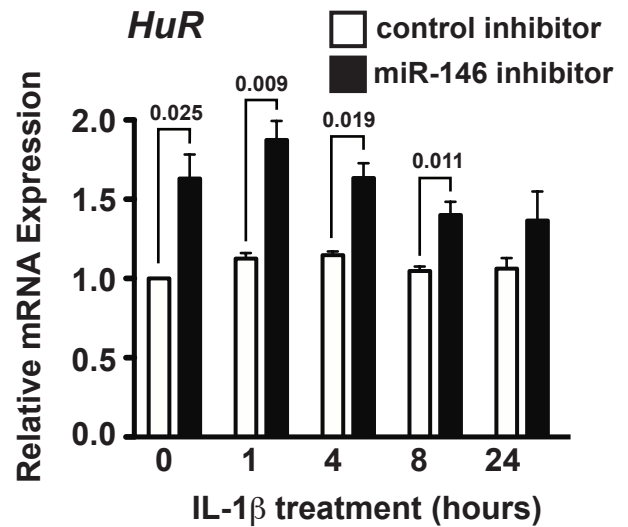

**Supporting Information Figure 5: miR-146 controls the expression of *HuR* mRNA.**

Over-expression of miR-146a in endothelial cells reduced levels of *HuR* mRNA in IL-1 $\beta$ -treated HUVEC (left), as assessed by qRT-PCR, while inhibition of miR-146 increased *HuR* mRNA (right). p-values of significant differences (t-test) are indicated above (n = 4-5).

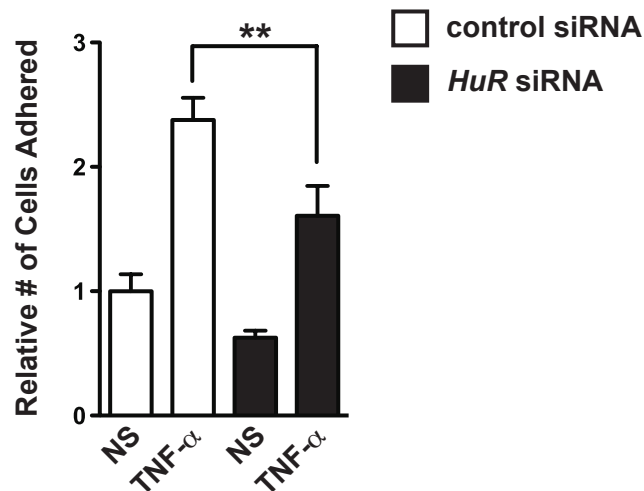

**Supporting Information Figure 6: *HuR* knock-down represses THP-1 adhesion to TNF- $\alpha$ -treated endothelial cells**

- Shown is a representative experiment (quantification of 3 images in 3 independent wells). ANOVA, p < 0.0001. \*\* indicates a significant decrease (p < 0.01) in THP-1 adhesion to TNF- $\alpha$ -treated HUVEC transfected with *HuR* siRNA compared to control siRNA.

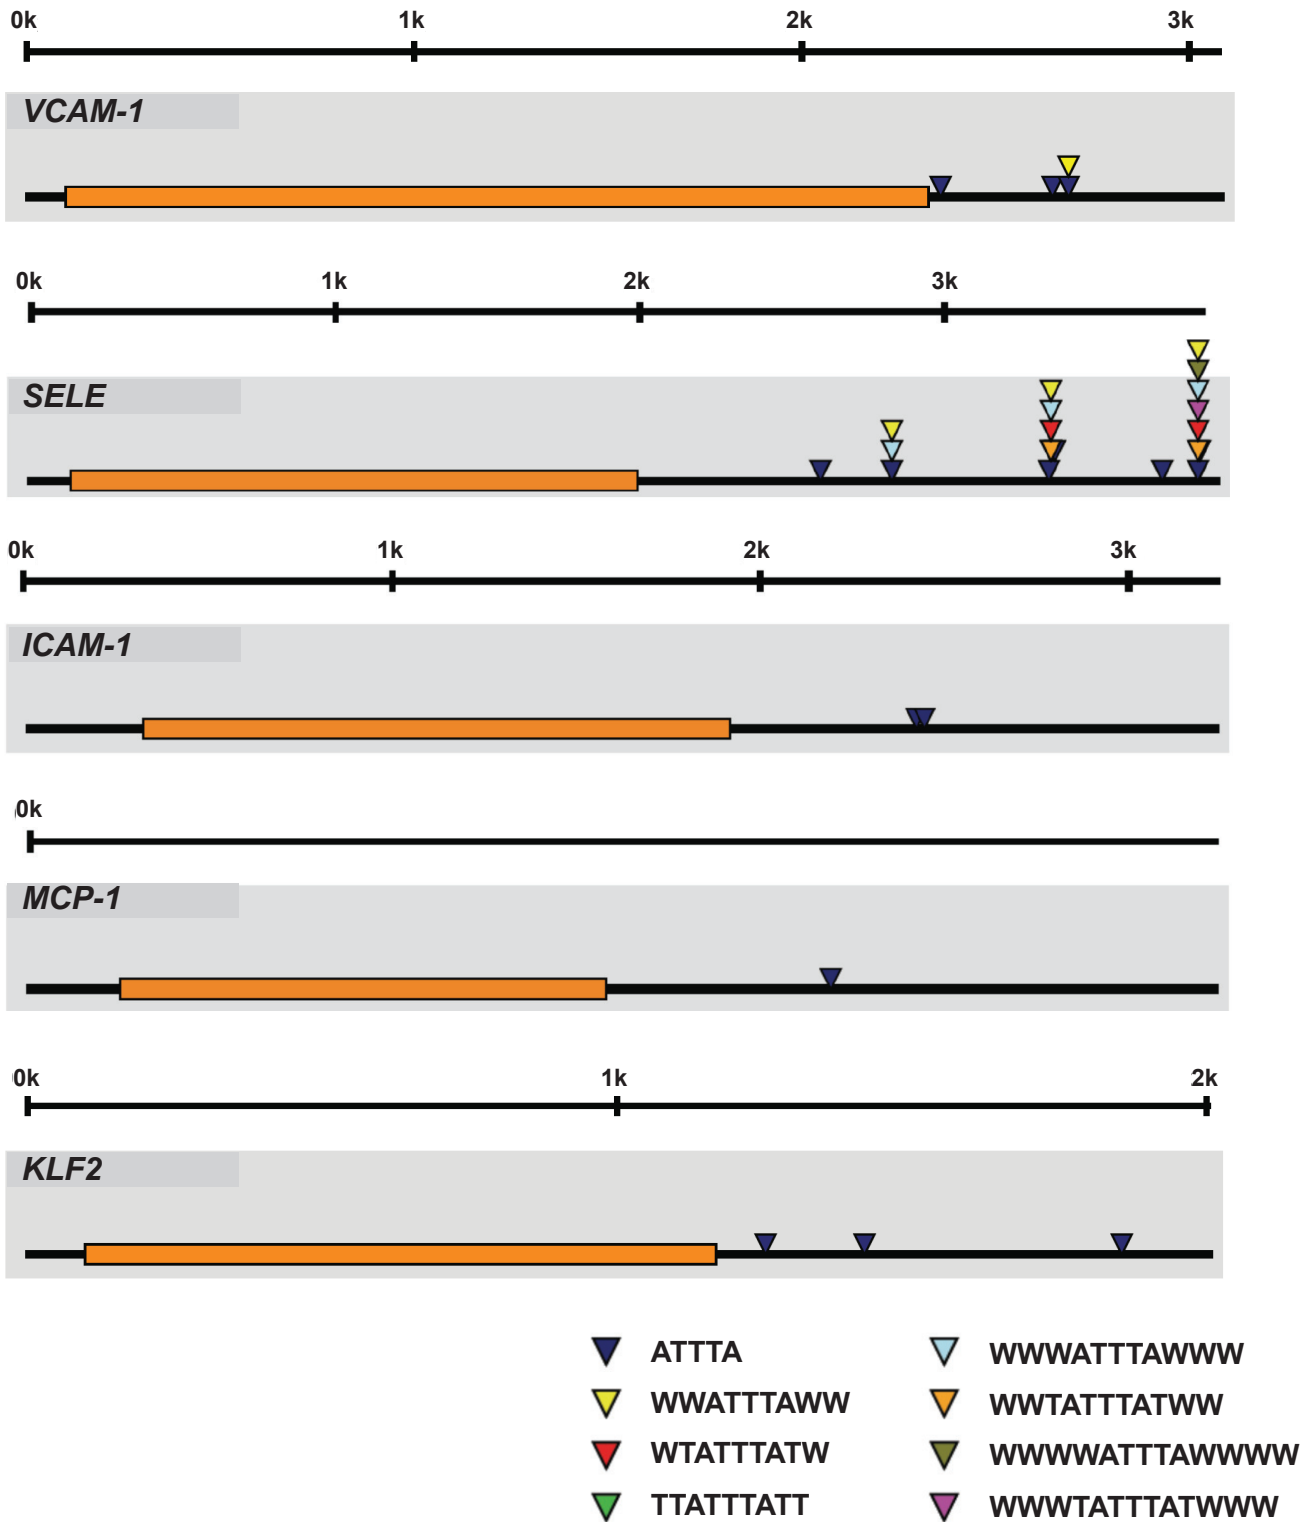

**Supporting Information Figure 7: Predicted AU-rich elements (AREs) in the 3' UTRs of genes involved in endothelial activation** - Prediction of AREs was performed using AREsite (Gruber *et al*, *Nucleic Acids Research*, 2010). The coding region of each transcript is indicated in orange. The various types of AREs are indicated by colored triangles.



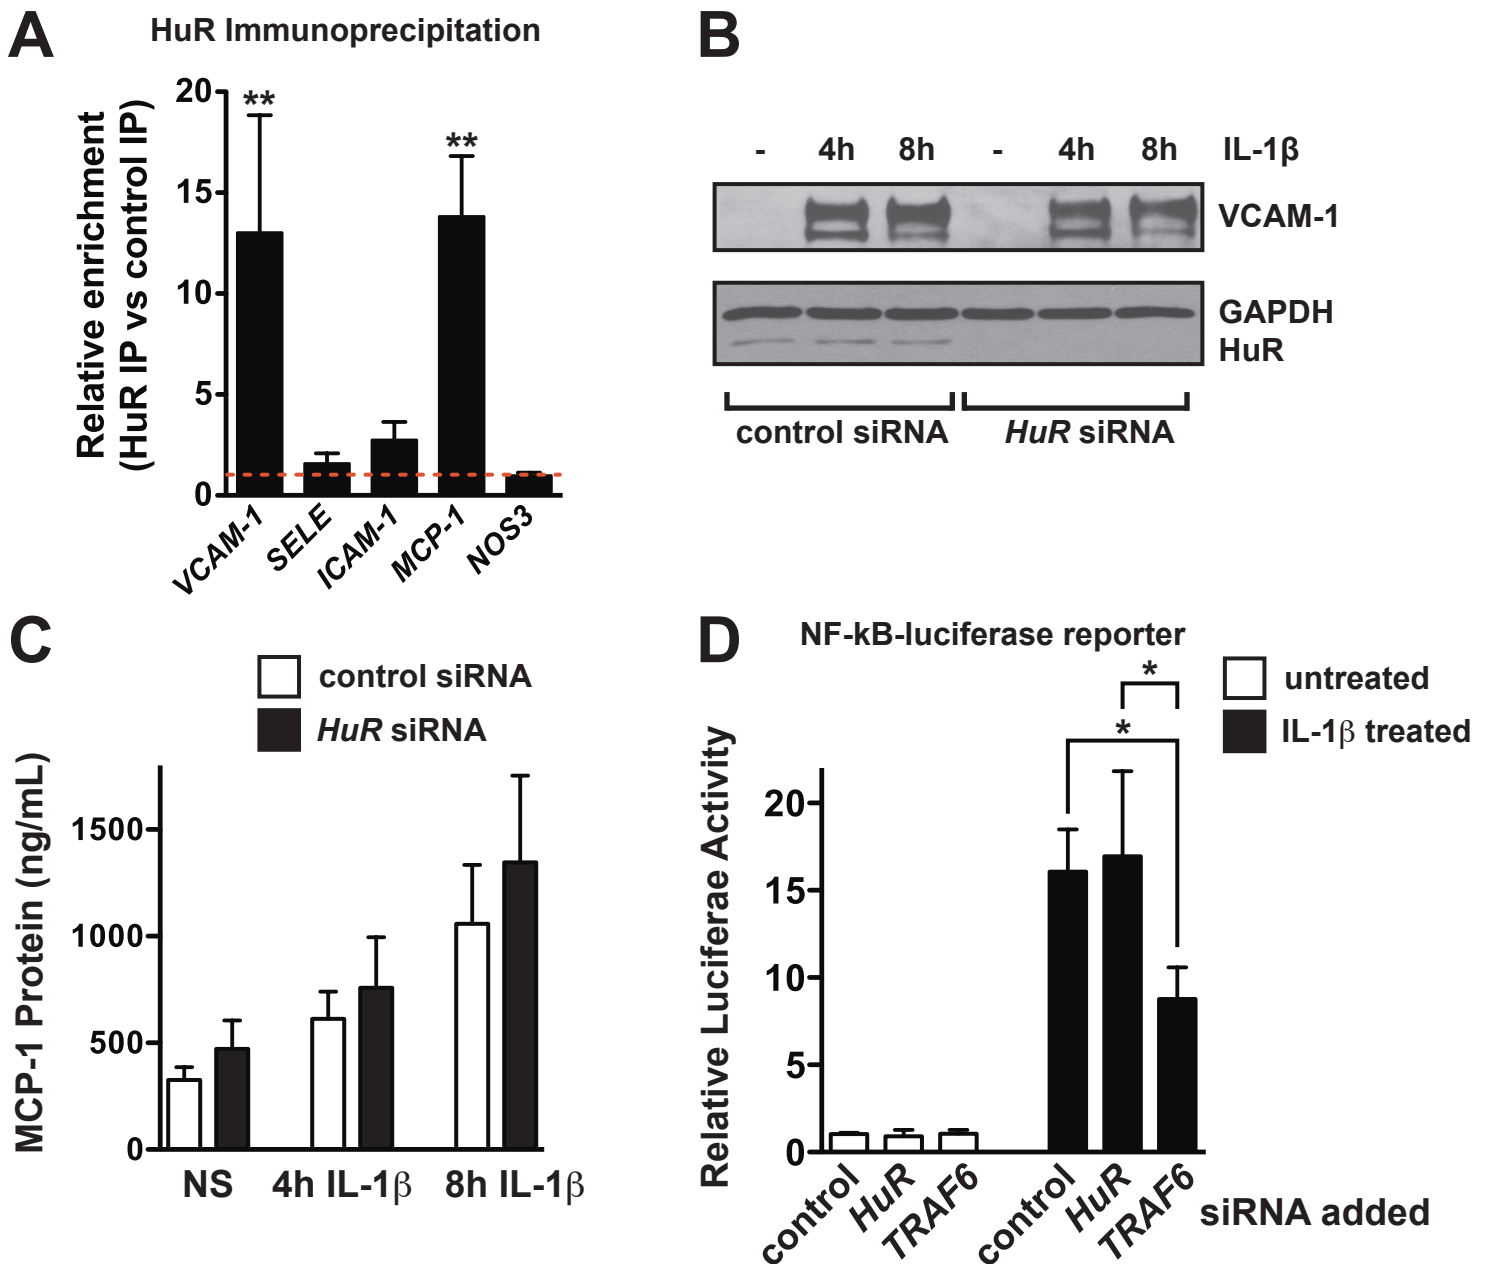

**Supporting Information Figure 8: HuR binds to VCAM-1 and MCP-1 mRNA but does not regulate the induction of these genes by IL-1 $\beta$**  - (A) HuR was immunoprecipitated from IL-1 $\beta$ -treated endothelial cells (4 h), RNA was isolated and the expression of several inflammatory genes and eNOS (*NOS3*) was assessed by qRT-PCR. Control immunoprecipitation was performed using an antibody to V5. *VCAM-1* and *MCP-1* were significantly enriched in HuR immunoprecipitates compared to V5 immunoprecipitates (n = 4). Repeated measures ANOVA, p=0.0021. \*\* indicates a significant difference compared to V5 immunoprecipitation, p<0.01. (B) Expression of *VCAM-1* in response to IL-1 $\beta$  treatment was not affected by *HuR* knock-down. A representative blot is shown. (C) Expression of *MCP-1* was not affected by *HuR* knock-down, as assessed by ELISA. Shown is the mean +/- SEM (n = 3). (D) Activation of NF- $\kappa$ B signaling was not affected by *HuR* knock-down, but was significantly decreased in *TRAF6* knock-down cells, as assessed by NF- $\kappa$ B-luciferase reporter assay (n = 4). Repeated measures ANOVA, p<0.0001. \* indicates a significant difference, p<0.05.

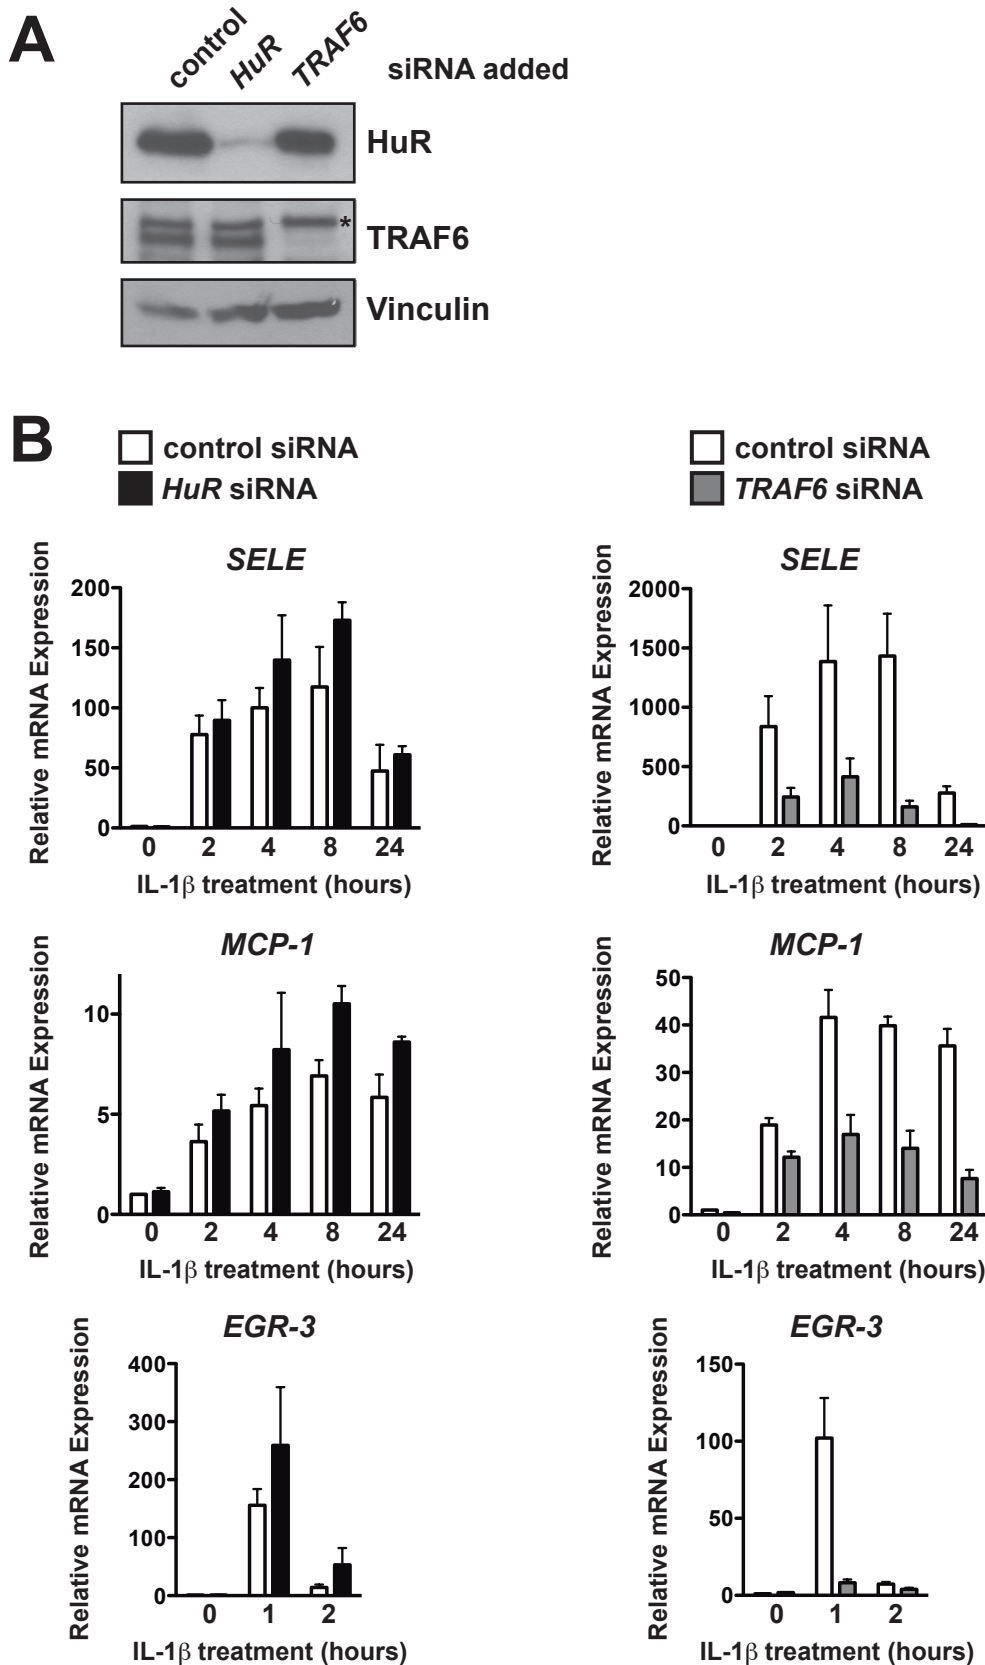

**Supporting Information Figure 9: The miR-146 targets, *HuR* and *TRAF6*, have divergent effects on the induction of inflammatory genes - (A)** Western blot demonstrating the efficient knock-down of *HuR* or *TRAF6*. Vinculin was used as a loading control. \* indicates a non-specific band. **(B)** The induction of *SELE*, *MCP-1* and *EGR-3* was assessed in *HuR* (left) or *TRAF6* (right) knock-down cells in response to IL-1 $\beta$  treatment. While *TRAF6* knock-down decreased the induction of these genes, *HuR* knock-down had no effect (n = 3).

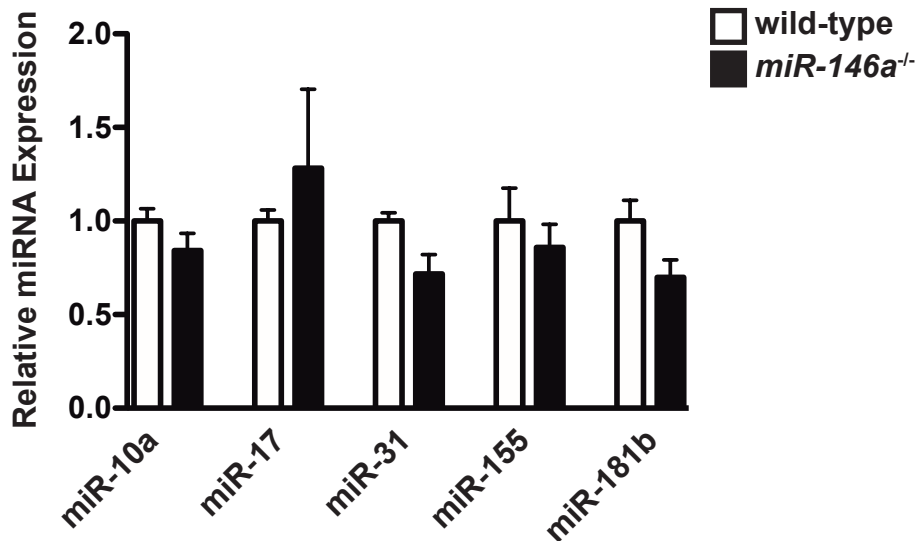

**Supporting Information Figure 10: MicroRNAs previously implicated in regulating inflammation are not appreciably altered in *miR-146a*<sup>-/-</sup> mice** - MicroRNA expression was assessed in the hearts of wild-type and *miR-146a*<sup>-/-</sup> mice (3-4 months of age) by qRT-PCR. Data was normalized to the expression of miR-126 (n = 6).

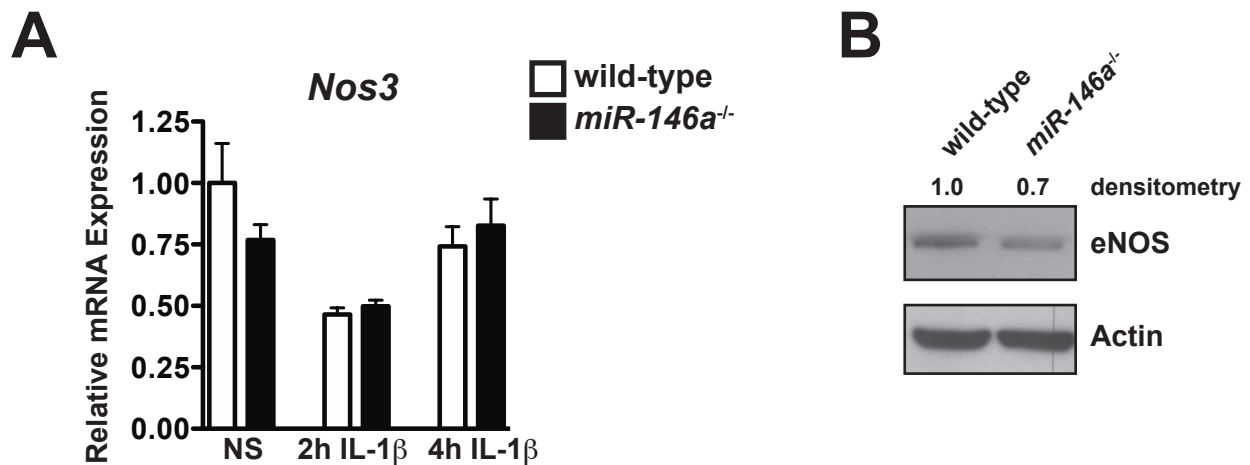

**Supporting Information Figure 11: Expression of eNOS is modestly decreased in *miR-146a*<sup>-/-</sup> mice** - (A) *Nos3* (eNOS) mRNA expression was assessed by qRT-PCR in wild-type and *miR-146a*<sup>-/-</sup> hearts, revealing a trend towards decreased levels in knock-out mice (n = 3-6). NS = non-stimulated. (B) Expression of eNOS protein was assessed in wild-type and *miR-146a*<sup>-/-</sup> hearts by western blot. A representative blot is shown.

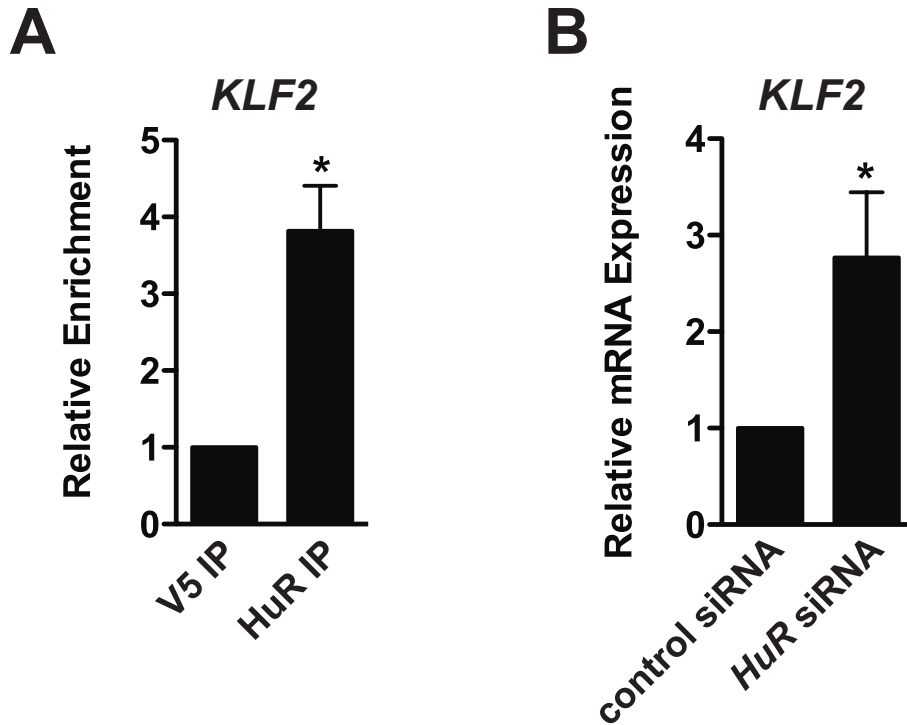

**Supporting Information Figure 12: *KLF2* mRNA is bound by HuR and knock-down of *HuR* leads to increased levels of *KLF2* transcripts - (A) *KLF2* mRNA was enriched in HuR immunoprecipitates from unstimulated HUVEC compared to control immunoprecipitates (V5), as assessed by qRT-PCR (t-test,  $p=0.017$ ,  $n = 4$ ). (B) *KLF2* mRNA was increased in HUVEC transfected with *HuR* siRNA (t-test,  $p=0.030$ ,  $n = 5$ ).**

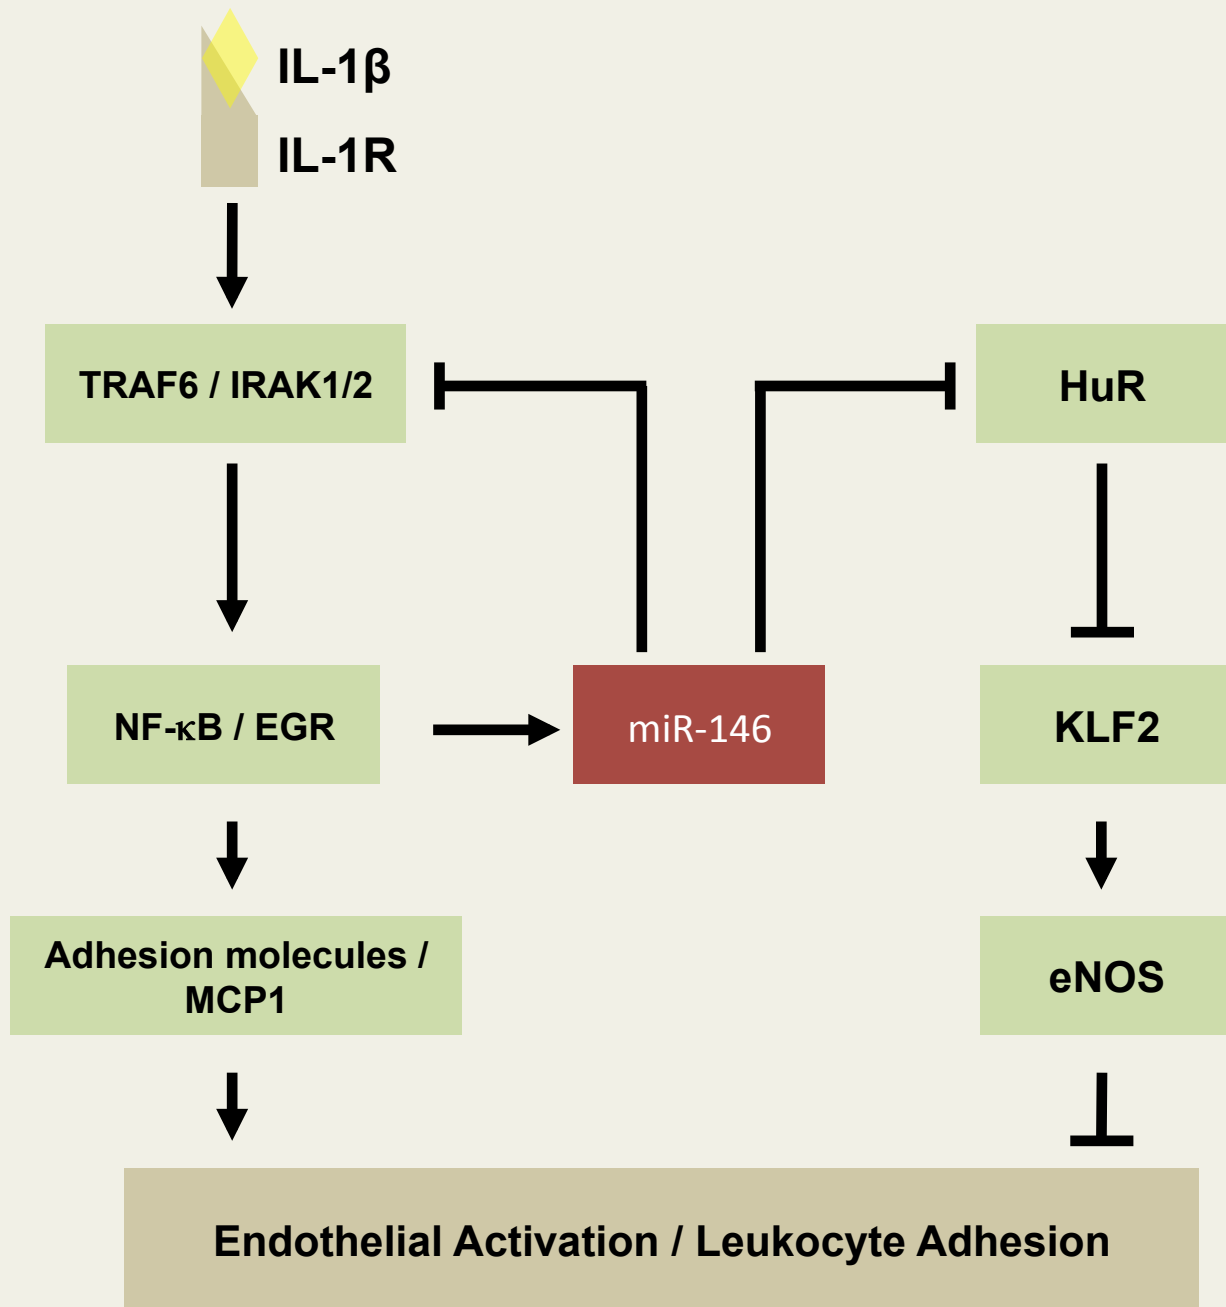

**Supporting Information Figure 13: Schematic of a miR-146 feedback loop that controls endothelial activation.** Pro-inflammatory cytokines activate the NF- $\kappa$ B and EGR transcription factors, which induce the expression of leukocyte adhesion molecules and chemokines, such as MCP-1. These pathways also induce the expression of miR-146, which targets TRAF6 and IRAK1/2, and functions as a negative regulator that represses inflammatory signaling. MiR-146 also targets HuR, which represses KLF2, a potent transcriptional activator of eNOS. Nitric oxide produced by eNOS is a vasodilator and a repressor of leukocyte and platelet adhesion to the endothelium.
